# Supplementary material for: Baseline gene signatures of reactogenicity to Ebola vaccination: a machine learning approach across multiple cohorts
Source: PubMed Central journal article supplement (PMC10663260; doi:10.3389/fimmu.2023.1259197), 2023-11-08
Supplement: Image_3.pdf [file Image_3.pdf]

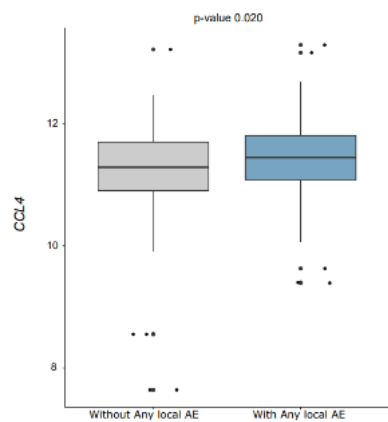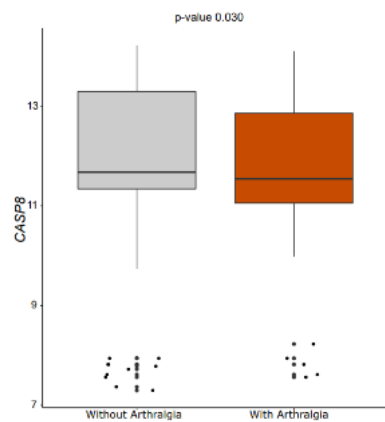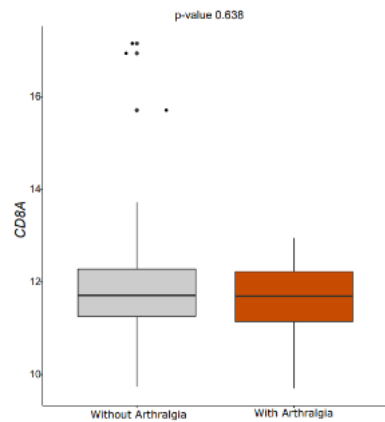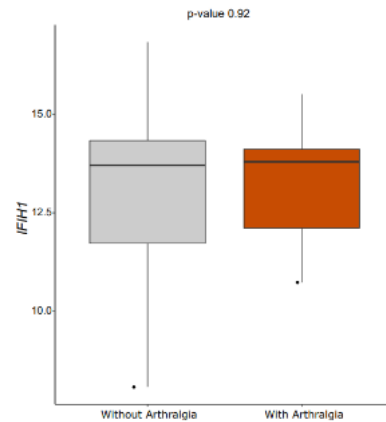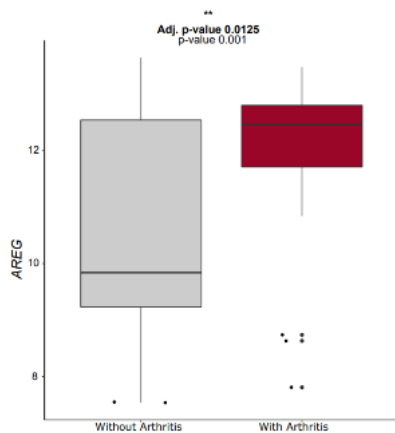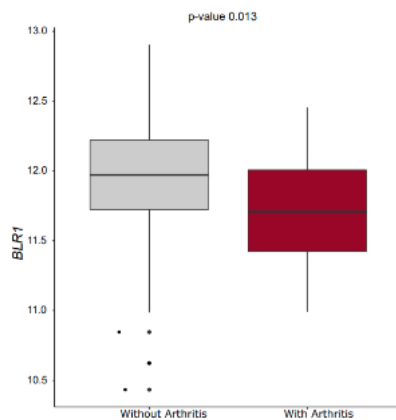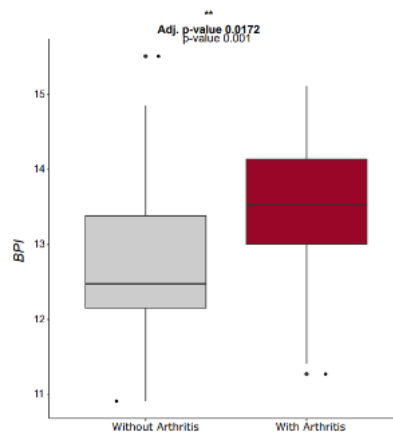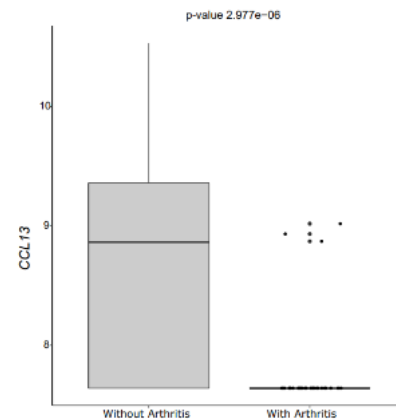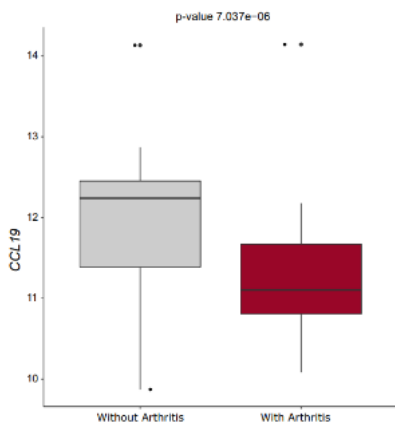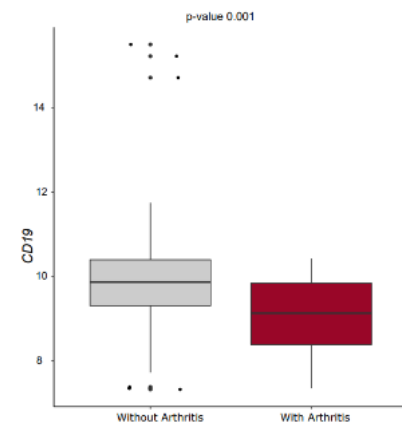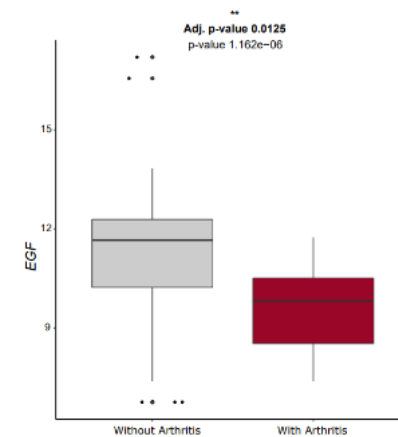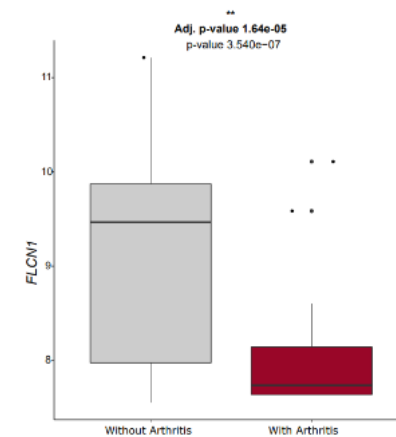

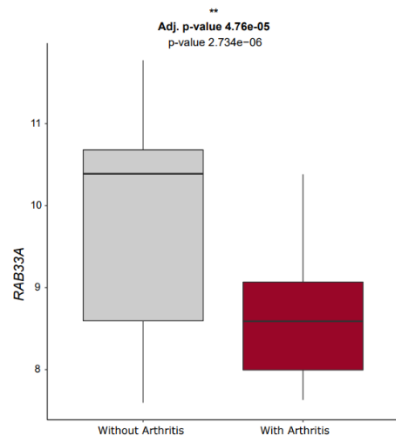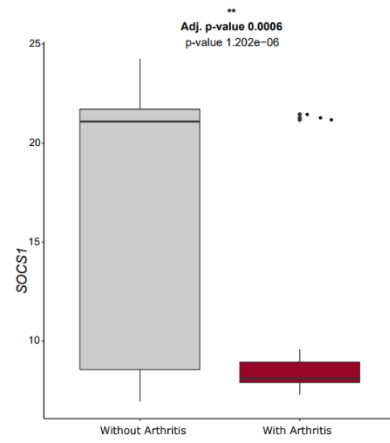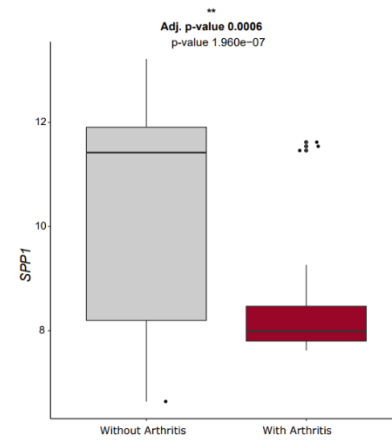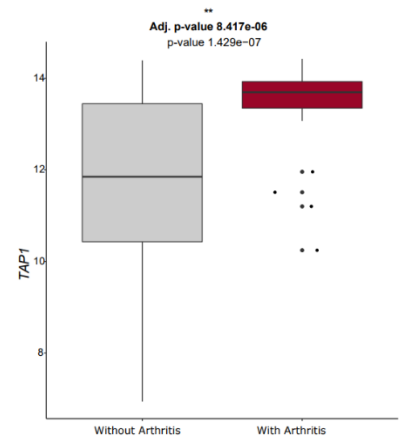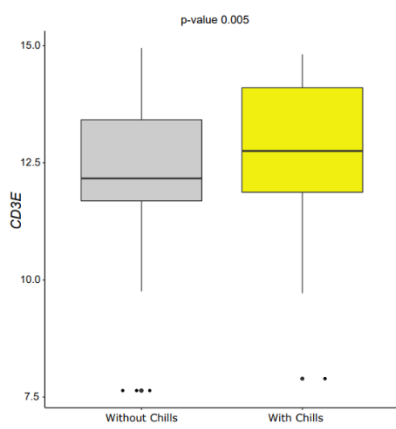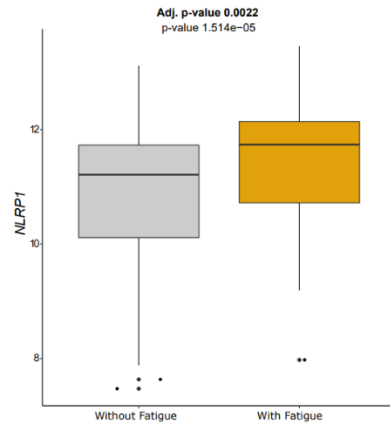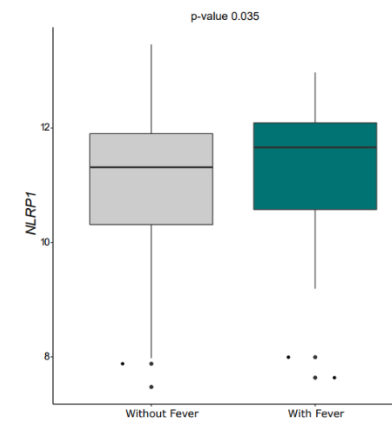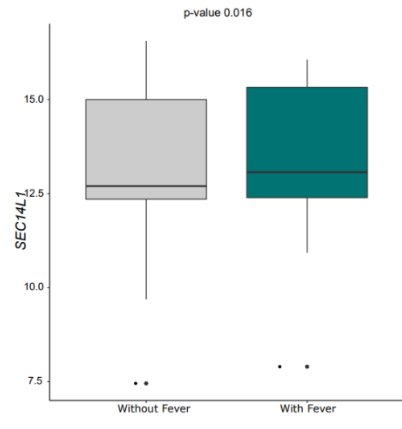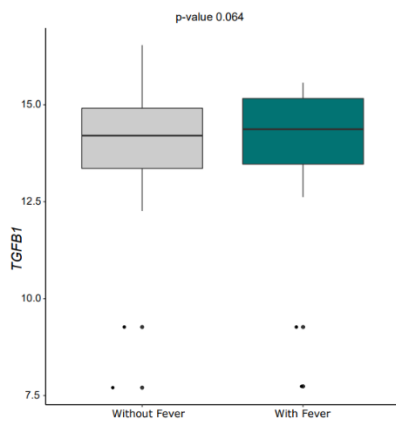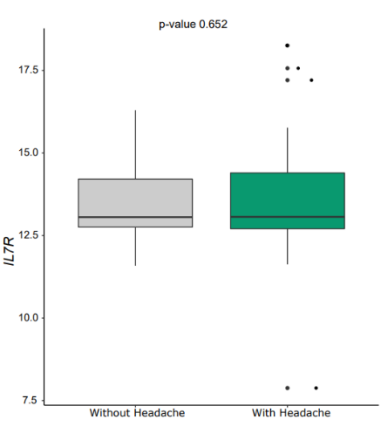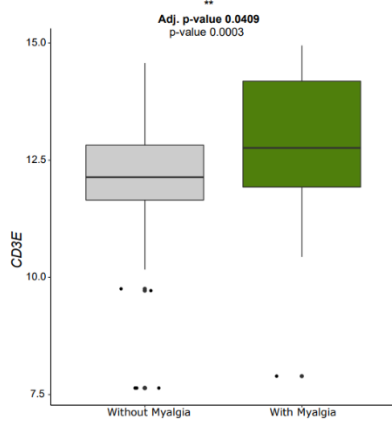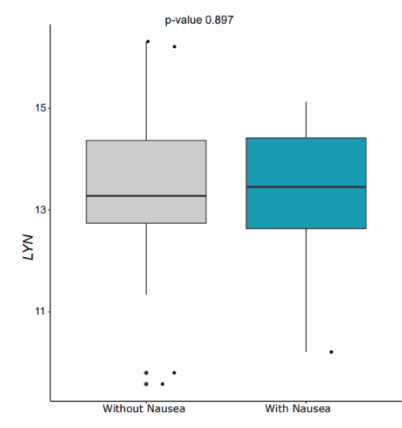

**Supplementary Figure 3.** Gene expression dispersion between participants with or without adverse effects. The boxplots show the log<sub>2</sub> transformed expression of the genes selected in the network in participants with and without the specific adverse effect. The p-values obtained with the Wilcoxon test are shown in the plots. The significant p-values obtained following Benjamini Hochberg (BH) correction for multiple comparisons are highlighted in bold.
