# Supplementary material for: Baseline gene signatures of reactogenicity to Ebola vaccination: a machine learning approach across multiple cohorts
Source: PubMed Central journal article supplement (PMC10663260; doi:10.3389/fimmu.2023.1259197), 2023-11-08
Supplement: Table_1.pdf [file Table_1.pdf]

**Supplementary table 1.** The absolute number and percentage of participants' genders within each cohort.

| <b>Cohort</b> | <b>Absolute number<br/>(Percentage)</b> |               |
|---------------|-----------------------------------------|---------------|
|               | <b>Male</b>                             | <b>Female</b> |
| USA           | 267 (52,05%)                            | 246 (47,95%)  |
| Switzerland   | 62 (53,91%)                             | 53 (46,09%)   |
| Kenya         | 30 (75%)                                | 10 (25%)      |
| Gabon         | 94 (81,74%)                             | 21 (18,26%)   |
