# Supplementary material for: Baseline gene signatures of reactogenicity to Ebola vaccination: a machine learning approach across multiple cohorts
Source: PubMed Central journal article supplement (PMC10663260; doi:10.3389/fimmu.2023.1259197), 2023-11-08
Supplement: Table_2.pdf [file Table_2.pdf]

**Supplementary table 2.** The median age for each cohort.

| <b>Cohort</b> | <b>Age (Median)</b> |
|---------------|---------------------|
| USA           | 36                  |
| Switzerland   | 41                  |
| Kenya         | 31.5                |
| Gabon         | 25                  |
