# Supplementary material for: Baseline gene signatures of reactogenicity to Ebola vaccination: a machine learning approach across multiple cohorts
Source: PubMed Central journal article supplement (PMC10663260; doi:10.3389/fimmu.2023.1259197), 2023-11-08
Supplement: Table_3.pdf [file Table_3.pdf]

**Supplementary table 3.** The percentage of participants with dcRT-MLPA data available within each cohort.

| Cohort      | dcRT-MLPA data available (%) |
|-------------|------------------------------|
| Switzerland | 100                          |
| Kenya       | 92.5                         |
| Gabon       | 72.17                        |
| USA         | 28.95                        |
