# Supplementary material for: Baseline gene signatures of reactogenicity to Ebola vaccination: a machine learning approach across multiple cohorts
Source: PubMed Central journal article supplement (PMC10663260; doi:10.3389/fimmu.2023.1259197), 2023-11-08
Supplement: Table_4.pdf [file Table_4.pdf]

**Supplementary table 4.** Comparison of the ranking and frequency of adverse effects between 786 participants with reactogenicity data and 343 participants with available dcRT-MLPA data.

| AEs          | 786 volunteers |                   | 343 dcRT-MLPA volunteers |                   |
|--------------|----------------|-------------------|--------------------------|-------------------|
|              | Ranking        | AEs frequency (%) | Ranking                  | AEs frequency (%) |
| Any Local AE | 1              | 53.25             | 1                        | 48.4              |
| Arthralgia   | 7              | 13.67             | 7                        | 17.2              |
| Arthritis    | 9              | 6.39              | 8                        | 8.2               |
| Chills       | 6              | 21.5              | 6                        | 29.9              |
| Fatigue      | 2              | 49.17             | 2                        | 48.1              |
| Fever        | 5              | 28.9              | 5                        | 34.4              |
| Headache     | 3              | 46.55             | 3                        | 47.5              |
| Myalgia      | 4              | 31.27             | 4                        | 36.7              |
| Nausea       | 8              | 6.3               | 9                        | 7                 |
