# Supplementary material for: Baseline gene signatures of reactogenicity to Ebola vaccination: a machine learning approach across multiple cohorts
Source: PubMed Central journal article supplement (PMC10663260; doi:10.3389/fimmu.2023.1259197), 2023-11-08
Supplement: Table_5.pdf [file Table_5.pdf]

**Supplementary table 5.** List of the 144 genes and their associated pathways that are part of the dcRT-MLPA panel.

| <b>Gene</b> | <b>Pathway</b>                                   |
|-------------|--------------------------------------------------|
| AIRE        | T cell subset markers                            |
| AREG        | Cell growth - proliferation                      |
| ASAP1       | Small GTPases - (Rho) GTPase activating proteins |
| BCL2        | Apoptosis - Survival                             |
| BLR1        | G protein-coupled receptors                      |
| BMP6        | Cell growth - proliferation                      |
| BPI         | Anti-microbial activity                          |
| CAMTA1      | Transcriptional regulators - activators          |
| CASP8       | Apoptosis - Survival                             |
| CCL11       | Chemokines                                       |
| CCL13       | Chemokines                                       |
| CCL19       | Chemokines                                       |
| CCL2        | Myeloid associated genes                         |
| CCL22       | Myeloid associated genes                         |
| CCL3        | Myeloid associated genes                         |
| CCL4        | Treg associated genes                            |
| CCL5        | Myeloid associated genes                         |
| CCR7        | T cell subset markers                            |
| CD14        | Myeloid associated genes                         |
| CD163       | Myeloid associated genes                         |
| CD19        | Immune cell subset markers - B cells             |
| CD209       | Pattern recognition receptors                    |
| CD274       | IFN signaling genes                              |
| CD3E        | T cell subset markers                            |
| CD4         | T cell subset markers                            |
| CD8A        | T cell subset markers                            |
| CLEC7A      | Pattern recognition receptors                    |
| CTLA4       | Treg associated genes                            |
| CX3CL1      | Chemokines                                       |

|        |                                   |
|--------|-----------------------------------|
| CXCL10 | Th1 associated genes              |
| CXCL13 | Myeloid associated genes          |
| CXCL9  | Chemokines                        |
| DSE    | Inflammation                      |
| EGF    | Cell growth - proliferation       |
| FASLG  | Apoptosis - Survival              |
| FCGR1A | IFN signaling genes               |
| FLCN1  | Apoptosis - Survival              |
| FOXP3  | Treg associated genes             |
| FPR1   | Myeloid associated genes          |
| GATA3  | Th2 associated genes              |
| GBP1   | IFN signaling genes               |
| GBP2   | IFN signaling genes               |
| GBP5   | IFN signaling genes               |
| GNLY   | Cytotoxicity markers              |
| GZMA   | Cytotoxicity markers              |
| GZMB   | Cytotoxicity markers              |
| HCK    | Cell activation                   |
| HPRT   | Mitochondrial Stress - Proteasome |
| IFI16  | IFN signaling genes               |
| IFI35  | IFN signaling genes               |
| IFI44  | IFN signaling genes               |
| IFI44L | IFN signaling genes               |
| IFI6   | IFN signaling genes               |
| IFIH1  | IFN signaling genes               |
| IFIT2  | IFN signaling genes               |
| IFIT3  | IFN signaling genes               |
| IFIT5  | IFN signaling genes               |
| IFITM3 | IFN signaling genes               |
| IFNG   | Th1 associated genes              |
| IL10   | Th2 associated genes              |
| IL12A  | Myeloid associated genes          |
| IL12B  | Myeloid associated genes          |
| IL13   | Th2 associated genes              |

|         |                                       |
|---------|---------------------------------------|
| IL15    | Th1 associated genes                  |
| IL17A   | Th17 associated genes                 |
| IL1B    | Th1 associated genes                  |
| IL2     | Th1 associated genes                  |
| IL22RA1 | Th17 associated genes                 |
| IL23A   | Myeloid associated genes              |
| IL2RA   | Treg associated genes                 |
| IL4     | Th2 associated genes                  |
| IL4d2   | Th2 associated genes                  |
| IL5     | Th2 associated genes                  |
| IL6     | Th2 associated genes                  |
| IL7R    | T cell subset markers                 |
| IL9     | Th9 associated genes                  |
| INDO    | IFN signaling genes                   |
| IRF7    | IFN signaling genes                   |
| KIF1B   | Intracellular transport               |
| LAG3    | Treg associated genes                 |
| LTF     | Anti-microbial activity               |
| LYN     | Cell activation                       |
| MARCO   | Scavenger receptors                   |
| MMP9    | Inflammation                          |
| MRC1    | Pattern recognition receptors         |
| MRC2    | Pattern recognition receptors         |
| NCAM1   | Immune cell subset markers - NK cells |
| NEDD4L  | E3 ubiquitin protein ligases          |
| NLRC4   | Inflammasome components               |
| NLRP1   | Inflammasome components               |
| NLRP10  | Inflammasome components               |
| NLRP11  | Inflammasome components               |
| NLRP12  | Inflammasome components               |
| NLRP13  | Inflammasome components               |
| NLRP2   | Inflammasome components               |
| NLRP3   | Inflammasome components               |
| NLRP4   | Inflammasome components               |

|         |                                                  |
|---------|--------------------------------------------------|
| NLRP6   | Inflammasome components                          |
| NLRP7   | Inflammasome components                          |
| NOD1    | Pattern recognition receptors                    |
| NOD2    | Pattern recognition receptors                    |
| OAS1    | IFN signaling genes                              |
| OAS2    | IFN signaling genes                              |
| OAS3    | IFN signaling genes                              |
| PRF1    | Cytotoxicity markers                             |
| PTPRCv1 | T cell subset markers                            |
| PTPRCv2 | T cell subset markers                            |
| RAB13   | Small GTPases - (Rho) GTPase activating proteins |
| RAB24   | Small GTPases - (Rho) GTPase activating proteins |
| RAB33A  | Small GTPases - (Rho) GTPase activating proteins |
| RORC    | Th17 associated genes                            |
| SEC14L1 | Intracellular transport                          |
| SLAMF7  | Cell activation                                  |
| SOCS1   | IFN signaling genes                              |
| SPP1    | Inflammation                                     |
| STAT1   | IFN signaling genes                              |
| STAT2   | IFN signaling genes                              |
| TAGAP   | Small GTPases - (Rho) GTPase activating proteins |
| TAP1    | IFN signaling genes                              |
| TAP2    | IFN signaling genes                              |
| TBC1D7  | Small GTPases - (Rho) GTPase activating proteins |
| TBX21   | Th1 associated genes                             |
| TGFB1   | Treg associated genes                            |
| TGFBR2  | Cell growth - proliferation                      |
| TIMP2   | Inflammation                                     |
| TLR1    | Pattern recognition receptors                    |
| TLR10   | Pattern recognition receptors                    |
| TLR2    | Pattern recognition receptors                    |
| TLR3    | Pattern recognition receptors                    |

|          |                                         |
|----------|-----------------------------------------|
| TLR4     | Pattern recognition receptors           |
| TLR5     | Pattern recognition receptors           |
| TLR6     | Pattern recognition receptors           |
| TLR7     | Pattern recognition receptors           |
| TLR8     | Pattern recognition receptors           |
| TLR9     | Pattern recognition receptors           |
| TNF      | Th1 associated genes                    |
| TNFRSF18 | Treg associated genes                   |
| TNFRSF1A | Apoptosis - Survival                    |
| TNFRSF1B | Apoptosis - Survival                    |
| TNIP1    | Inflammation                            |
| TWIST1   | Transcriptional regulators - activators |
| VEGF     | Cell growth - proliferation             |
| ZNF331   | Transcriptional regulators - activators |
| ZNF532   | Transcriptional regulators - activators |

---
